# Supplementary material for: Taste-related reward is associated with weight loss following bariatric surgery
Source: JCI journal article supplement (doi:10.1172/jci137772), 2020-05-19
Supplement: sd1 [file 1]

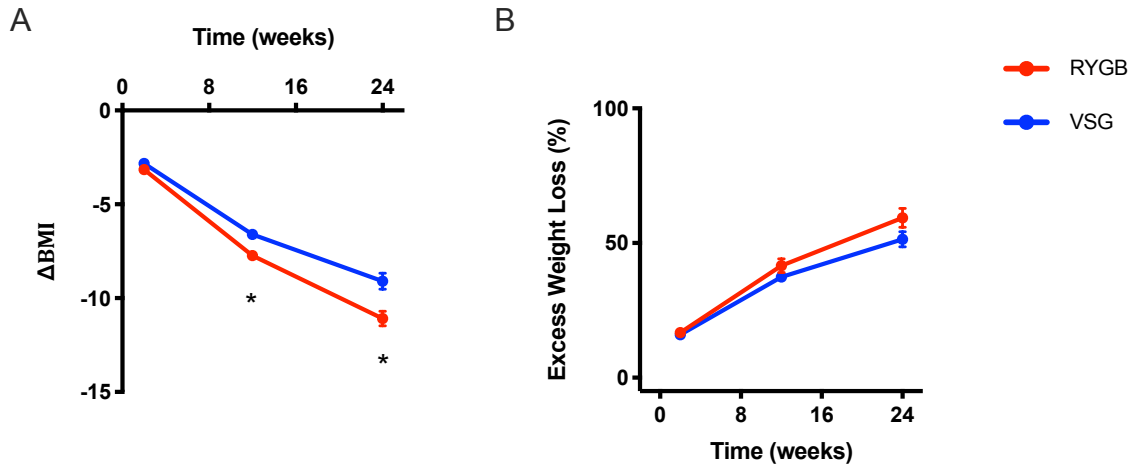

### Supplementary Figure 1. %EWL and ΔBMI following RYGB and VSG

A) ΔBMI at baseline (0 weeks) and 2, 12, and 24 weeks following surgery in patients who received RYGB (red; N=23) or VSG (blue; N=25).

B) %EWL from baseline (0 weeks) at 2, 12, and 24 weeks post-surgery in patients who received RYGB (red; N=23) or VSG (blue; N=25).

A repeated measures ANOVA revealed a main effect of time ( $F_{(1.4,64.9)}=543.798$ ,  $p<0.001$ ), group ( $F_{(1,46)}=11.343$ ,  $p=0.002$ ), and time x group interaction ( $F_{(1.4,64.9)}=7.462$ ,  $p=0.004$ ) for ΔBMI. A time effect ( $F_{(1.2,56.9)}=357.930$ ,  $p<0.001$ ) was observed for %EWL, but no group effect or time x group interaction ( $p\geq 0.083$ ).

ΔBMI = change in body mass index, %EWL= percent excess weight loss, RYGB = Roux-en Y gastric bypass, VSG = vertical sleeve gastrectomy, ANOVA = analysis of variance

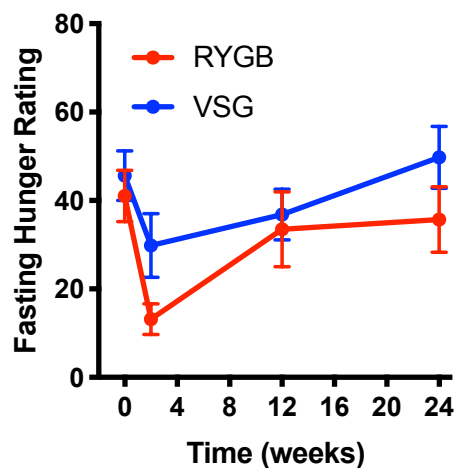

### Supplementary Figure 2. Fasting Hunger Ratings following RYGB and VSG

Mean  $\pm$  SEM fasting hunger ratings on VAS from patients prior to surgery (0 weeks) and 2, 12, and 24 weeks following RYGB (red; N=20) or VSG (blue; N=20). A repeated measures ANOVA revealed a main effect of time ( $F_{(2,3,88,9)}=6.108$ ,  $p=0.002$ ). No time  $\times$  group interaction or group effect was observed ( $p \geq 0.104$ ).

SEM=standard error, VAS=visual analog scale, RYGB = Roux-en Y gastric bypass, VSG=vertical sleeve gastrectomy, ANOVA=analysis of variance

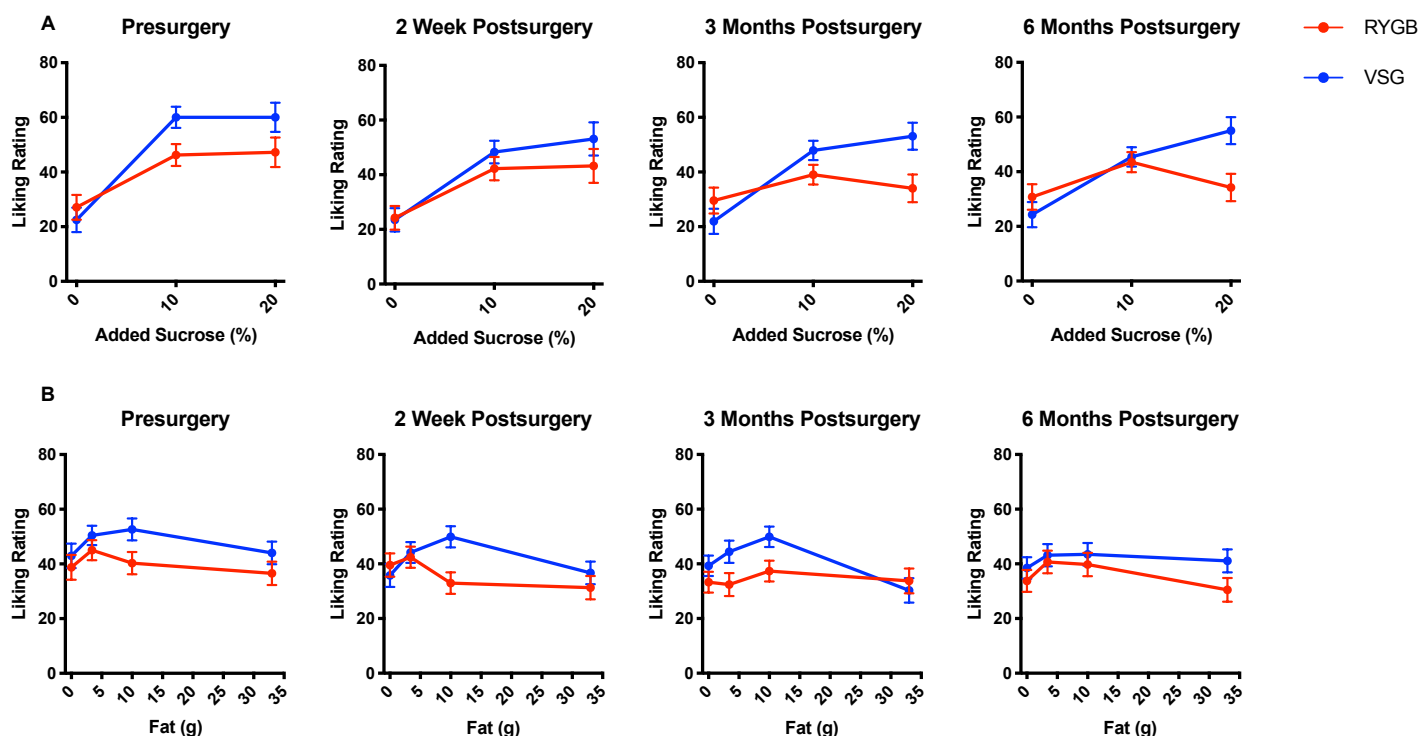

**Supplementary Figure 3. Changes in Concentration-Dependent Liking for Sucrose and Fat following Bariatric Surgery**

(A,B) Mean  $\pm$  SEM liking ratings from bariatric patients using the VAS for the 12 mixtures varying in A) sucrose and B) fat content in the taste preference test at baseline (presurgery) and 2 weeks, 3 months, and 6 months following RYGB (red; N=21) or VSG (blue; N=22).

(A) Repeated measures ANOVAs revealed a main effect of sucrose concentration only at baseline ( $F_{(1.3,53.3)}=30.566$ ,  $p<0.001$ ) and 2 weeks after surgery ( $F_{(1.2,49.4)}=17.069$ ,  $p<0.001$ ). By 3 months and out to 6 months post-surgery a significant group  $\times$  sucrose concentration interaction was identified (3M:  $F_{(1.5,59.7)}=5.753$ ,  $p=0.011$ ; 6M:  $F_{(1.4,58.7)}=5.899$ ,  $p=0.010$ ) along with a main effect of sucrose concentration (3M:  $F_{(1.5,59.7)}=13.259$ ,  $p<0.001$ ; 6M:  $F_{(1.4,58.7)}=11.648$ ,  $p<0.001$ ).

(B) No main effects or significant interactions for fat concentration were identified by repeated measures ANOVAs at baseline ( $p\geq 0.053$ ). A main effect of fat concentration ( $F_{(3,123)}=4.600$ ,  $p=0.004$ ) and a significant group  $\times$  fat concentration interaction was identified at 2 weeks ( $F_{(3,123)}=5.211$ ,  $p=0.002$ ), whereas only a main effect of concentration persisted at 3 month post-surgery ( $F_{(2.3,96.1)}=4.809$ ,  $p=0.007$ ). All main effects of fat concentration and significant interactions were no longer present by 6 months following bariatric surgery ( $p\geq 0.115$ ).

SEM=standard error, VAS=visual analog scale, RYGB = Roux-en Y gastric bypass, VSG=vertical sleeve gastrectomy, ANOVA=analysis of variance, M=months

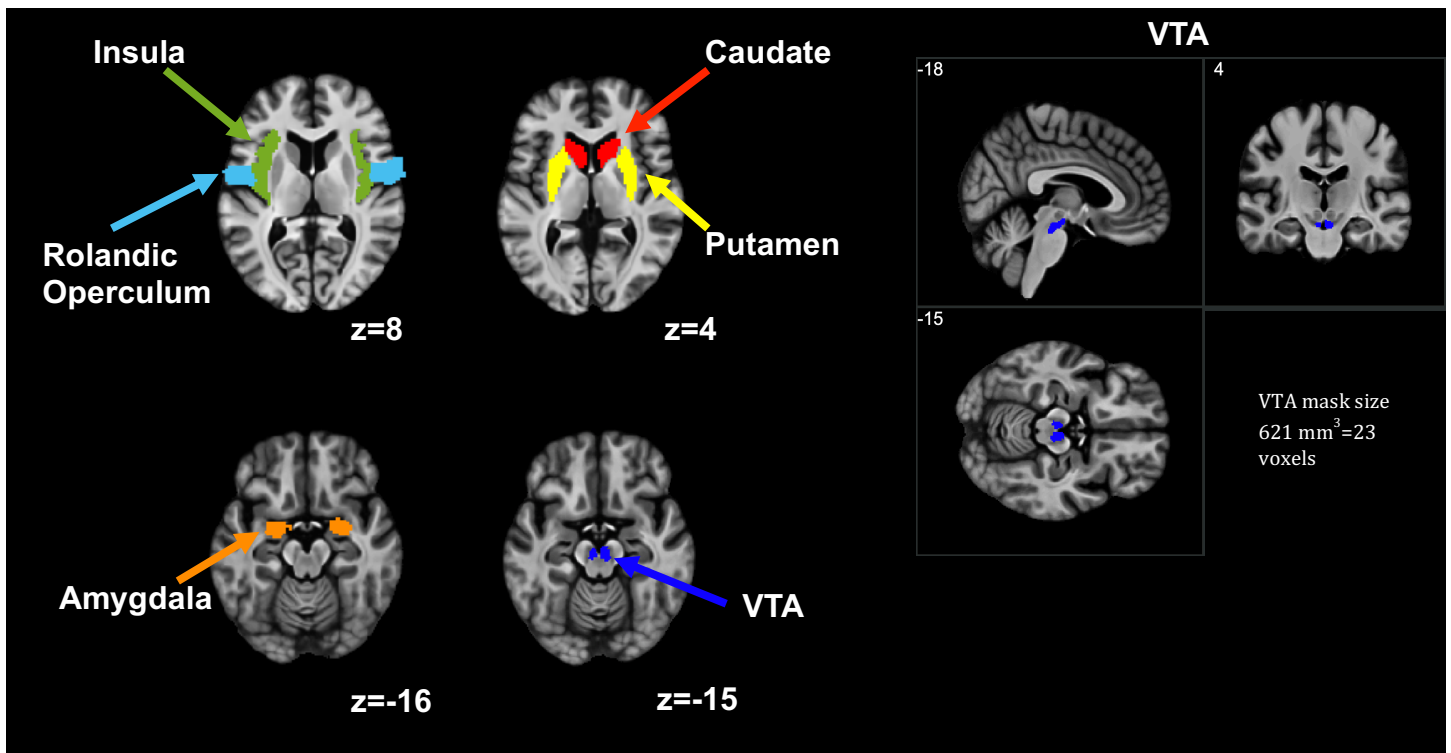

#### Supplementary Figure 4. Masks for *a priori* ROI Analyses

Masks for the bilateral amygdala, insular cortex and Rolandic operculum (combined), caudate, and putamen were defined using the Automated Anatomical Labeling from the WFU PickAtlas 3.0.5b. Mask for bilateral VTA was adapted from the high-resolution in vivo probabilistic atlas from Pauli et al (47).

ROI=region of interest, VTA=Ventral Tegmental Area

**Supplementary Table 1. Mean  $\pm$  SEM for Changes in Body Weight Measures After VSG and RYGB**

| <b>Weight Loss Measurement</b>              | <b>VSG (N=25)</b> | <b>RYGB (N=23)</b> |
|---------------------------------------------|-------------------|--------------------|
| <b>Postoperative Weight</b>                 |                   |                    |
| 2 weeks postoperative weight                | 251.73 $\pm$ 5.90 | 251.06 $\pm$ 7.09  |
| 12 weeks postoperative weight               | 228.29 $\pm$ 5.69 | 223.27 $\pm$ 7.31  |
| 24 weeks postoperative weight               | 212.66 $\pm$ 5.41 | 202.98 $\pm$ 7.36  |
| <b>Postoperative BMI</b>                    |                   |                    |
| 2 weeks postoperative BMI                   | 40.58 $\pm$ 0.96  | 41.41 $\pm$ 1.04   |
| 12 weeks postoperative BMI                  | 36.81 $\pm$ 0.94  | 36.82 $\pm$ 1.11   |
| 24 weeks postoperative BMI                  | 34.31 $\pm$ 0.94  | 33.46 $\pm$ 1.11   |
| <b>Postoperative <math>\Delta</math>BMI</b> |                   |                    |
| 2 weeks postoperative $\Delta$ BMI          | 2.83 $\pm$ 0.18   | 3.15 $\pm$ 0.15    |
| 12 weeks postoperative $\Delta$ BMI         | 6.60 $\pm$ 0.29   | 7.73 $\pm$ 0.24    |
| 24 weeks postoperative $\Delta$ BMI         | 9.10 $\pm$ 0.43   | 11.09 $\pm$ 0.39   |
| <b>% Total Weight Loss</b>                  |                   |                    |
| 2 weeks postoperative %TWL                  | 6.53 $\pm$ 0.40   | 7.12 $\pm$ 0.36    |
| 12 weeks postoperative %TWL                 | 15.27 $\pm$ 0.62  | 17.58 $\pm$ 0.73   |
| 24 weeks postoperative %TWL                 | 21.02 $\pm$ 0.92  | 25.15 $\pm$ 1.04   |
| <b>% Excess Weight Loss</b>                 |                   |                    |
| 2 weeks postoperative %EWL                  | 15.93 $\pm$ 1.09  | 16.71 $\pm$ 1.07   |
| 12 weeks postoperative %EWL                 | 37.43 $\pm$ 1.98  | 41.60 $\pm$ 2.59   |
| 24 weeks postoperative %EWL                 | 51.41 $\pm$ 2.84  | 59.32 $\pm$ 3.52   |

**Supplementary Table 2. Intraclass Correlations (ICC) Assessing the Consistency of Preoperative Ratings Between Classes of Mixtures.**

| <b>Mixture</b>                         | <b>ICC</b> |
|----------------------------------------|------------|
| 0% added sucrose                       | 0.818      |
| 10% added sucrose                      | 0.560      |
| 20% added sucrose                      | 0.784      |
| 10% + 20% added sucrose                | 0.821      |
| Cream                                  | 0.380      |
| Half-and-half                          | 0.186      |
| Whole Milk                             | 0.080      |
| Skim Milk                              | 0.402      |
| Fat (Cream, Half-and-half, Whole Milk) | 0.598      |

**Supplementary Table 3. Peak Coordinates in the VTA where Preoperative Activation to Taste Mixtures Correlated with 6-Month Weight Loss Outcomes following RYGB.**

| Weight Loss Outcome | Mixture                        | Coordinates* |     |     | z-value | k  |
|---------------------|--------------------------------|--------------|-----|-----|---------|----|
|                     |                                | x            | y   | z   |         |    |
| %TWL                | Cream, 0% Added Sucrose        | 0            | -25 | -19 | 3.80    | 13 |
|                     | Skim milk, 20% Added Sucrose   | 3            | -22 | -16 | 3.06    | 7  |
|                     |                                | -3           | -22 | -16 | 2.84    | 4  |
|                     | Preoperative Preferred Mixture | 0            | -25 | -19 | 3.74    | 13 |
| %EWL                | Cream, 0% Added Sucrose        | 0            | -25 | -19 | 3.65    | 12 |
|                     | Skim milk, 20% Added Sucrose   | -3           | -22 | -16 | 3.12    | 12 |
|                     | Preoperative Preferred Mixture | 0            | -25 | -19 | 3.63    | 12 |
| $\Delta$ BMI        | Cream, 0% Added Sucrose        | 3            | -25 | -22 | 3.15    | 8  |
|                     | Preoperative Preferred Mixture | 3            | -25 | -22 | 3.13    | 4  |

\*peak-level threshold  $p_{FWE} < 0.05$ .

degrees of freedom: RYGB [1,17]; VSG [1,18] (no significant correlations identified)

**Supplementary Table 4. Peak Coordinates in the VTA where Change in Activation from Baseline to 2 Weeks in Response to Taste Mixtures Correlated with 6-Month Weight Loss Outcomes following RYGB.**

| Weight Loss Outcome | Mixture                      | Coordinates* |     |     | z-value | k |
|---------------------|------------------------------|--------------|-----|-----|---------|---|
|                     |                              | x            | y   | z   |         |   |
| %TWL                | Cream, 0% Added Sucrose      | -3           | -25 | -19 | 2.83    | 8 |
|                     | Skim milk, 20% Added Sucrose | 6            | -25 | -16 | 2.88    | 3 |
| %EWL                | Cream, 0% Added Sucrose      | -3           | -25 | -22 | 2.87    | 4 |
|                     | Skim milk, 20% Added Sucrose | 3            | -25 | -19 | 2.96    | 4 |
| $\Delta$ BMI        | Cream, 0% Added Sucrose      | 3            | -22 | -16 | 2.69*   | 1 |

\*peak-level threshold  $p_{FWE} < 0.05$ .

\* $p_{FWE} = 0.067$

degrees of freedom: RYGB [1,13]; VSG [1,15] (no significant correlations identified)



STROBE Statement—Checklist of items that should be included in reports of *cohort studies*

|                           | Item No | Recommendation                                                                                                                                                                                                                                                                                                                                                                                                |
|---------------------------|---------|---------------------------------------------------------------------------------------------------------------------------------------------------------------------------------------------------------------------------------------------------------------------------------------------------------------------------------------------------------------------------------------------------------------|
| <b>Title and abstract</b> | 1       | (a) Indicate the study's design with a commonly used term in the title or the abstract<br>(b) Provide in the abstract an informative and balanced summary of what was done and what was found                                                                                                                                                                                                                 |
| <b>Introduction</b>       |         |                                                                                                                                                                                                                                                                                                                                                                                                               |
| Background/rationale      | 2       | Explain the scientific background and rationale for the investigation being reported                                                                                                                                                                                                                                                                                                                          |
| Objectives                | 3       | State specific objectives, including any prespecified hypotheses                                                                                                                                                                                                                                                                                                                                              |
| <b>Methods</b>            |         |                                                                                                                                                                                                                                                                                                                                                                                                               |
| Study design              | 4       | Present key elements of study design early in the paper                                                                                                                                                                                                                                                                                                                                                       |
| Setting                   | 5       | Describe the setting, locations, and relevant dates, including periods of recruitment, exposure, follow-up, and data collection                                                                                                                                                                                                                                                                               |
| Participants              | 6       | (a) Give the eligibility criteria, and the sources and methods of selection of participants. Describe methods of follow-up<br>(b) For matched studies, give matching criteria and number of exposed and unexposed                                                                                                                                                                                             |
| Variables                 | 7       | Clearly define all outcomes, exposures, predictors, potential confounders, and effect modifiers. Give diagnostic criteria, if applicable                                                                                                                                                                                                                                                                      |
| Data sources/measurement  | 8*      | For each variable of interest, give sources of data and details of methods of assessment (measurement). Describe comparability of assessment methods if there is more than one group                                                                                                                                                                                                                          |
| Bias                      | 9       | Describe any efforts to address potential sources of bias                                                                                                                                                                                                                                                                                                                                                     |
| Study size                | 10      | Explain how the study size was arrived at                                                                                                                                                                                                                                                                                                                                                                     |
| Quantitative variables    | 11      | Explain how quantitative variables were handled in the analyses. If applicable, describe which groupings were chosen and why                                                                                                                                                                                                                                                                                  |
| Statistical methods       | 12      | (a) Describe all statistical methods, including those used to control for confounding<br>(b) Describe any methods used to examine subgroups and interactions<br>(c) Explain how missing data were addressed<br>(d) If applicable, explain how loss to follow-up was addressed<br>(e) Describe any sensitivity analyses                                                                                        |
| <b>Results</b>            |         |                                                                                                                                                                                                                                                                                                                                                                                                               |
| Participants              | 13*     | (a) Report numbers of individuals at each stage of study—eg numbers potentially eligible, examined for eligibility, confirmed eligible, included in the study, completing follow-up, and analysed<br>(b) Give reasons for non-participation at each stage<br>(c) Consider use of a flow diagram                                                                                                               |
| Descriptive data          | 14*     | (a) Give characteristics of study participants (eg demographic, clinical, social) and information on exposures and potential confounders<br>(b) Indicate number of participants with missing data for each variable of interest<br>(c) Summarise follow-up time (eg, average and total amount)                                                                                                                |
| Outcome data              | 15*     | Report numbers of outcome events or summary measures over time                                                                                                                                                                                                                                                                                                                                                |
| Main results              | 16      | (a) Give unadjusted estimates and, if applicable, confounder-adjusted estimates and their precision (eg, 95% confidence interval). Make clear which confounders were adjusted for and why they were included<br>(b) Report category boundaries when continuous variables were categorized<br>(c) If relevant, consider translating estimates of relative risk into absolute risk for a meaningful time period |

|                          |    |                                                                                                                                                                            |
|--------------------------|----|----------------------------------------------------------------------------------------------------------------------------------------------------------------------------|
| Other analyses           | 17 | Report other analyses done—eg analyses of subgroups and interactions, and sensitivity analyses                                                                             |
| <b>Discussion</b>        |    |                                                                                                                                                                            |
| Key results              | 18 | Summarise key results with reference to study objectives                                                                                                                   |
| Limitations              | 19 | Discuss limitations of the study, taking into account sources of potential bias or imprecision. Discuss both direction and magnitude of any potential bias                 |
| Interpretation           | 20 | Give a cautious overall interpretation of results considering objectives, limitations, multiplicity of analyses, results from similar studies, and other relevant evidence |
| Generalisability         | 21 | Discuss the generalisability (external validity) of the study results                                                                                                      |
| <b>Other information</b> |    |                                                                                                                                                                            |
| Funding                  | 22 | Give the source of funding and the role of the funders for the present study and, if applicable, for the original study on which the present article is based              |

\*Give information separately for exposed and unexposed groups.

**Note:** An Explanation and Elaboration article discusses each checklist item and gives methodological background and published examples of transparent reporting. The STROBE checklist is best used in conjunction with this article (freely available on the Web sites of PLoS Medicine at <http://www.plosmedicine.org/>, Annals of Internal Medicine at <http://www.annals.org/>, and Epidemiology at <http://www.epidem.com/>). Information on the STROBE Initiative is available at <http://www.strobe-statement.org>.
